# Supplementary material for: A newly characterized natural sphalerite reference material (IGGSph-1) for in situ S and Zn isotope microanalysis
Source: Royal Society of Chemistry journal article supplement (doi:10.1039/d5ja00373c), 2026-01-01
Supplement: d5ja00373c1.xlsx [file d5ja00373c1.xlsx]

## Sheet: Table S1
Table S1 Summary of the instrument parameters
Faraday Cup Configurations for Fe isotopes on Neptune Plus and S isotopes on Neptune
L4	L3		L2	L1	C		H1	H2	H3	H4
	60Ni			64Zn	66Zn		67Zn	68Zn	70Zn
				32S	33S		34S
Neptune / Neptune Plus MC-ICP-MS						NWRFemto Laser Ablation System
RF power		1200 W				Wavelength		257 nm
Plasma gas		16 L/min (Ar)				Pulse duration		70 ~ 90 fs
Auxiliary gas		0.9 L/min (Ar)				Energy density		Approximate 0.1 J/cm2 at energy output of 5% for Zn and S isotope ratio analysis,
Sample depth		About -0.6 ~ -1.2 mm				Beam size		25 ~ 30 mm and 40 mm for Zn and S isotope ratio analysis, respectively
Interface cones		Sample cone: standard cone
		Skimmer cone: X cone
Make up gas		About 0.80 ~ 1.3 L/min (Ar)				Pulse repeat rate		3 ~ 8 Hz and 10 ~ 15 Hz for Zn and S isotope ratio analysis, respectively
Resolution		High resolution mode(m/Δm ~8000-9000)
Integration		A single analysis consists of a block of 60 cycles with an integration time of 0.262 s per cycle for Zn and S isotope ratio analysis				Carrier gas (He)		About 700 mL/min for Zn and S isotope ratio analysis

## Sheet: Table S2
Table S2 Element concentrations (wt%) of IGGSph-1 by EPMA
Grain No.	Spot No.	Element concentration (wt%)
		Zn	S	Co	Fe	Pb	Total
1	1	65.031	33.689	0.053	1.644	-	100.503
	2	64.65	33.467	0.037	1.6	-	99.759
	3	65.076	33.828	0.045	1.583	-	100.581
	4	64.802	33.8	0.039	1.597	-	100.309
	5	64.615	33.71	0.05	1.602	0.039	100.087
	6	64.911	33.634	0.059	1.606	0.042	100.283
	7	64.853	33.845	0.054	1.613	-	100.42
	8	64.768	33.958	0.042	1.575	-	100.381
	9	64.535	33.353	0.045	1.604	-	99.559
	10	64.595	33.821	0.053	1.603	0.057	100.194
	11	64.688	33.862	0.047	1.64	0.065	100.342
	12	64.71	33.701	0.043	1.588	-	100.124
	Average	64.7695	33.7223	0.04725	1.60458		100.212
	1S	0.171663	0.172719	0.00664865	0.0204159		0.298379
2	1	64.535	33.63	0.066	1.611	0.071	99.958
	2	64.473	33.624	0.055	1.609	0.075	99.867
	3	64.246	33.655	0.052	1.578	0.071	99.628
	4	64.718	33.74	0.056	1.613	-	100.16
	5	64.603	33.629	0.036	1.591	0.04	100.007
	6	64.642	33.648	0.057	1.583	-	99.983
	7	64.511	33.574	0.044	1.622	-	99.843
	8	64.758	33.681	0.039	1.554	-	100.125
	9	64.49	33.8	0.046	1.595	-	99.968
	10	64.4	33.792	0.06	1.562	0.058	99.871
	11	64.632	33.591	0.05	1.622	0.05	99.955
	12	64.375	33.495	0.037	1.647	0.061	99.622
	Average	64.5319	33.6549	0.0498333	1.59892		99.9156
	1S	0.148439	0.0885555	0.00957111	0.0269223		0.16545
3	1	64.163	33.345	0.024	1.581	-	99.158
	2	64.34	33.439	0.059	1.621	0.087	99.612
	3	64.012	33.557	0.026	1.605	0.056	99.267
	4	64.444	33.581	0.032	1.633	-	99.731
	5	64.238	33.647	0.046	1.655	0.051	99.677
	6	64.315	33.527	0.044	1.627	-	99.549
	7	64.099	33.373	0.04	1.631	-	99.164
	8	64.241	33.635	0.053	1.618	0.049	99.628
	9	63.873	33.675	0.042	1.64	0.041	99.312
	10	64.084	33.629	0.052	1.638	-	99.466
	11	63.631	33.46	0.032	1.618	-	98.798
	12	63.862	33.394	0.055	1.643	-	99.016
	Average	64.1085	33.5218	0.0420833	1.62583		99.3648
	1S	0.233613	0.11624	0.0116108	0.0194555		0.293023
4	1	64.479	33.719	0.041	1.646	-	99.919
	2	64.279	33.479	0.057	1.648	0.068	99.548
	3	64.336	33.519	0.049	1.603	-	99.56
	4	64.292	33.598	0.048	1.675	0.054	99.667
	5	64.227	33.447	0.05	1.604	-	99.394
	6	64.023	33.51	0.059	1.634	-	99.269
	7	64.345	33.558	0.044	1.632	0.062	99.687
	8	64.055	33.455	0.055	1.655	-	99.275
	9	64.071	33.53	0.047	1.64	-	99.299
	10	64.122	33.603	0.041	1.621	0.04	99.494
	11	64.057	33.521	0.041	1.615	-	99.319
	12	64.124	33.44	0.059	1.611	0.038	99.345
	Average	64.2008	33.5316	0.04925	1.632		99.4813
	1S	0.14588	0.0799118	0.00689038	0.0221031		0.20284
5	1	64.427	33.655	0.033	1.589	0.086	99.895
	2	64.382	33.755	0.061	1.603	-	99.908
	3	64.449	33.779	0.043	1.581	-	99.867
	4	64.222	33.74	0.022	1.602	-	99.621
	5	64.043	33.574	0.035	1.607	0.041	99.358
	6	64.055	33.761	0.064	1.576	-	99.483
	7	64.108	33.85	0.052	1.603	0.055	99.731
	8	64.18	33.705	0.055	1.552	0.058	99.586
	9	63.87	33.615	0.035	1.615	0.101	99.262
	10	63.871	33.662	0.04	1.599	-	99.205
	11	63.952	33.866	0.047	1.545	-	99.453
	12	63.66	33.552	0.056	1.582	0.053	98.983
	Average	64.1016	33.7095	0.04525	1.58783		99.5293
	1S	0.244148	0.100932	0.0127645	0.0218084		0.294784
6	1	64.364	33.537	0.05	1.627	0.056	99.635
	2	64.268	34.082	0.036	1.632	0.076	100.124
	3	64.952	33.555	0.048	1.616	-	100.232
	4	64.614	33.806	0.038	1.617	-	100.153
	5	64.901	33.669	0.049	1.616	-	100.328
	6	64.237	33.991	0.063	1.629	0.073	100.077
	7	64.644	33.922	0.052	1.556	0.037	100.239
	8	64.577	33.67	0.034	1.624	0.042	99.997
	9	64.231	33.415	0.057	1.623	0.042	99.37
	Average	64.532	33.7386	0.0474444	1.61556		100.017
	1S	0.275998	0.22595	0.00977383	0.0230711		0.314386
7	1	64.214	33.58	0.052	1.604	-	99.486
	2	64.277	33.577	0.047	1.631	-	99.546
	3	63.754	33.538	0.038	1.564	0.099	99
	4	64.138	33.639	0.063	1.639	-	99.557
	5	63.822	33.444	0.045	1.614	-	99.002
	6	64.019	33.439	0.055	1.635	-	99.186
	7	64.607	33.437	0.049	1.602	-	99.722
	8	64.37	33.607	0.053	1.64	0.038	99.727
	9	64.302	33.577	0.054	1.612	-	99.62
	Average	64.167	33.5376	0.0506667	1.61567		99.4273
	1S	0.269184	0.0779457	0.00705337	0.0243772		0.289364
8	1	64.316	33.836	0.073	1.596	-	99.832
	2	64.633	33.714	0.04	1.571	0.054	100.06
	3	64.441	33.63	0.047	1.568	0.045	99.754
	4	64.355	33.567	0.04	1.574	-	99.583
	5	63.718	33.516	0.04	1.571	-	98.853
	6	63.96	33.713	0.053	1.627	-	99.421
	7	64.258	33.672	0.048	1.608	-	99.662
	8	64.228	33.652	0.022	1.624	0.041	99.662
	9	64.275	33.505	0.05	1.584	-	99.461
	10	64.506	33.446	0.029	1.586	-	99.634
	Average	64.269	33.6251	0.0442	1.5909	0.0466667	99.5922
	1S	0.264318	0.117773	0.0139028	0.022088	0.00665833	0.317461
9	1	63.87	33.764	0.054	1.862	-	99.612
	2	64.264	33.6	0.064	1.835	0.059	99.852
	3	64.371	33.786	0.034	1.804	-	100.083
	4	64.069	33.782	0.063	1.824	-	99.798
	5	64.354	33.807	0.071	1.895	0.085	100.246
	6	64.054	33.703	0.065	1.819	0.057	99.777
	7	64.156	33.689	0.047	1.793	0.062	99.793
	8	64.129	33.785	0.049	1.791	-	99.82
	9	64.215	33.558	0.064	1.81	0.06	99.764
	10	64.352	33.729	0.068	1.806	0.054	100.059
	Average	64.1834	33.7203	0.0579	1.8239		99.8804
	1S	0.160548	0.0842642	0.0115897	0.0326614		0.189083
10	1	64.509	33.443	0.056	1.584	-	99.649
	2	64.807	33.571	0.031	1.613	0.049	100.141
	3	64.517	33.615	0.027	1.625	-	99.838
	4	64.329	33.643	0.036	1.633	0.061	99.747
	5	64.337	33.596	0.043	1.626	-	99.645
	6	64.596	33.658	0.052	1.594	0.051	100.033
	7	64.168	33.597	0.052	1.627	-	99.511
	8	64.62	33.588	0.034	1.588	0.072	99.959
	9	64.855	33.704	0.058	1.586	-	100.241
	10	64.663	33.684	0.067	1.6	0.053	100.121
	Average	64.5401	33.6099	0.0456	1.6076		99.8885
	1S	0.216226	0.0730212	0.01331	0.0192712		0.247128
11	1	64.151	33.951	0.056	1.589	0.338	100.131
	2	64.36	33.717	0.04	1.609	0.313	100.042
	3	64.156	33.604	0.022	1.547	0.357	99.699
	4	63.867	33.615	0.05	1.627	0.361	99.558
	5	63.911	33.595	0.035	1.628	0.38	99.561
	6	63.914	33.642	0.042	1.602	0.29	99.511
	7	64.098	33.521	0.041	1.65	0.365	99.685
	8	64.452	33.71	0.036	1.634	0.306	100.157
	9	64.888	33.555	0.055	1.596	0.33	100.477
	10	65.469	33.371	0.052	1.58	0.285	100.807
	Average	64.3266	33.6281	0.0429	1.6062	0.3325	99.9628
	1S	0.505907	0.150492	0.0105982	0.0302133	0.0331771	0.437867
12	1	63.953	33.55	0.047	1.653	0.335	99.581
	2	64.136	33.544	0.057	1.586	0.347	99.722
	3	63.917	33.677	0.047	1.601	0.335	99.632
	4	63.875	33.476	0.047	1.633	0.381	99.439
	5	64.015	33.712	0.045	1.665	0.343	99.827
	6	64.113	33.532	0.048	1.611	0.321	99.678
	7	64.18	33.534	0.033	1.628	0.38	99.808
	8	64.265	33.571	0.052	1.583	0.375	99.876
	9	64.092	33.492	0.046	1.602	0.404	99.684
	10	63.869	33.403	0.038	1.567	0.353	99.278
	11	64.17	33.46	0.049	1.619	0.329	99.688
	12	64.13	33.431	0.054	1.577	0.293	99.542
	Average	64.0596	33.5318	0.0469167	1.61042	0.349667	99.6462
	1S	0.130614	0.0915422	0.00647314	0.0304436	0.0308201	0.169336
Average of all data		64.3134	33.626	0.0473538	1.62525		99.7387
	1S	0.322086	0.140865	0.010607	0.063512		0.371343
	'-' indicaded 'lower than detection limit'.

## Sheet: Table S3
Table S3 The results of homogeneity test for Zn and S isotopic composition of IGGSph-1
Analytical No.	Mount 1		Mount 2		Mount 3
	d66Zn	d34S	d66Zn	d34S	d66Zn	d34S
1	0.04	-0.05	-0.02	-0.02	0.02	-0.04
2	-0.01	0.05	0.06	-0.02	0.02	-0.04
3	0.02	-0.01	-0.06	0.01	0.01	0.07
4	-0.03	-0.04	0.05	0.01	-0.03	0
5	0.06	0.01	-0.03	-0.03	0.02	-0.02
6	-0.03	0.01	-0.02	-0.04	0	-0.03
7	0	-0.03	0.04	0.03	0.01	-0.09
8	-0.01	0.01	-0.01	-0.03	0	0.07
9	0.02	0.02	-0.01	0.06	-0.02	0.03
10	-0.02	-0.05	0.04	-0.05	0.03	0
11	0.01	-0.01	-0.07	0.06	-0.02	0
12	0	0.07	0.03	-0.05	-0.05	0.14
13	-0.01	0.03	0	0	0.08	0.03
14	0	-0.09	0.02	0.03	-0.08	-0.07
15	-0.01	0.08	-0.03	-0.01	0.14	-0.05
16	0.02	-0.11	0.01	-0.04	-0.09	-0.06
17	-0.02	0.1	0.03	-0.01	0.03	-0.1
18	-0.02	-0.05	0	0.05	-0.02	0.06
19	0.04	-0.03	-0.02	0.01	0	-0.05
20	-0.03	0.07	0.01	-0.01	-0.01	0.13
21	0.01	-0.02	-0.03	-0.06	0.02	-0.07
22	-0.02	-0.04	0.03	0.07	0.02	-0.05
23	0.06	0.03	-0.02	-0.05	-0.06	0.06
24	-0.04	0	0.01	0.03	0.03	-0.01
25	0	-0.02	-0.07	0.03	0	-0.04
26	0	0.07	0.08	-0.08	0.03	0.06
27	0.01	-0.1	0	0.06	-0.06	0.04
28	-0.02	0.02	-0.05	-0.04	0.04	-0.08
29	0.02	-0.01	0.04	0.06	-0.03	0.06
30	-0.01	0.05	-0.04	-0.04	0.01	-0.11
31	-0.01	0.03	-0.01	-0.01	0.03	0.11
32	0.01	-0.09	0.05	0.08	-0.05	-0.01
33	0	0.07	-0.03	-0.11	0.02	-0.08
34	-0.03	-0.04	0.02	0.03	0.02	0
35	0.03	0.05	-0.01	0.05	-0.04	0.08
Average	0	0	0	0	0	0
2S	0.05	0.11	0.07	0.09	0.07	0.13
at	0.11	0.05	0.01	0.03	0.36	0.17
btcritical	2.03

## Sheet: Table S4
Table S4 The results of homogeneity test for Zn isotope composition of NBS-123 sphalerite
Analytical No.	Mount 1	Mount 2	Mount 3
	d66Zn	d66Zn	d66Zn
1	0.0378746	-0.0030468	-0.0572003
2	-0.0168896	-0.00887857	-0.0269189
3	-0.0700617	-0.00436688	-0.00586636
4	0.000600646	-0.0848246	0.0217683
5	0.0202447	-0.0194064	-0.00999813
6	0.00149214	0.04399	-0.0168857
7	-0.00761513	-0.0136079	-0.00164322
8	-0.0449619	-0.0171595	0.00380019
9	0.000296427	-0.0196431	0.00389346
10	-0.0419975	0.0574412	0.00722118
11	0.056095	0.00502884	-0.00969214
12	0.238878	-0.0192509	-0.0208312
13	-0.0839168	-0.0140889	0.0112352
14	-0.00780201	-0.011531	-0.0371853
15	-0.00438221	0.00360589	0.0375985
16	-0.0186346	0.023412	0.00633734
17	0.0181349	-0.0167431	0.0232227
18	-0.0716394	-0.00981022	-0.0095667
19	0.00807783	0.0397637	-0.000265162
20	-0.0206371	-0.003106	0.018249
21	-0.0123071	-0.0152525	0.0573424
22	-0.0246887	0.0819368	0.00990418
23	0.0340291	0.0360998	-0.0472869
24	-0.00934586	-0.0651205	0.00301946
25	0.0047705	0.0702191	-0.00762633
26	-0.0116166	0.0499194	-0.0547649
27	0.0367886	-0.0207582	-0.0279156
28	-0.0565169	-0.00384513	0.00293783
29	-0.00593929	-0.0131376	0.0120319
30	-0.00540783	-0.00571039	-0.00285354
31	0.0276841	-0.0616252	0.0205033
32	0.0136196	-0.0788113	-0.022491
33	-0.0741624	0.00612369	-0.00699938
34	0.0449834	0.0538586	0.0051842
35	0.0850093	-0.0188949	0.00293582
Average	0.00114446	-0.00163487	-0.00339446
2S	0.11217	0.0773147	0.0481003
at	0.120723	0.250199	0.835001
btcritical	2.03224

## Sheet: Table S5
Table S5 The zinc isotopic composition of NBS-123 sphalerite by fs-LA-ICPMS
Analytical No.	ad66ZnJMC-Lyon	2SE	ad68ZnJMC-Lyon	2SE
1	0.145131	0.0216941	0.297023	0.0238449
2	0.125929	0.0194084	0.308962	0.0258694
3	0.13961	0.0216384	0.275189	0.0231122
4	0.105998	0.0159888	0.247946	0.0190341
5	0.207878	0.0311616	0.294206	0.0249275
6	0.138115	0.0210608	0.284309	0.0247916
7	0.122074	0.0181842	0.197191	0.0153097
8	0.132608	0.0196371	0.220625	0.0172566
9	0.16006	0.0236651	0.253559	0.0209207
10	0.161553	0.0239932	0.257262	0.021716
11	0.155306	0.0229517	0.194539	0.0144872
12	0.113938	0.0170523	0.179549	0.0142831
13	0.128822	0.0192539	0.229128	0.0197929
14	0.154658	0.0233151	0.249518	0.020788
15	0.157874	0.0241387	0.289549	0.0237845
17
Average	0.143304		0.251904
b2S	0.0541674		0.0839122
